# Supplementary material for: 4β-Hydroxycholesterol Signals From the Liver to Regulate Peripheral Cholesterol Transporters
Source: PubMed Central journal article supplement (PMC7118195; doi:10.3389/fphar.2020.00361), 2020-03-27
Supplement: DataSheet_1.pdf [file DataSheet_1.pdf]

**SUPPLEMENTARY TABLE 1** Human oligonucleotide sequences used for qRT-PCR and conventional RT-PCR analyses with annealing temperatures ( $T_a$ ).

| <b>Gene</b>  | <b>Forward primer (5' - 3')</b> | <b>Reverse primer (5' - 3')</b> | <b><math>T_a</math> (°C)</b> |
|--------------|---------------------------------|---------------------------------|------------------------------|
| <i>abca1</i> | GAACATTACAGCAGATCAAGAAATCC      | ACTTTGGGAGAGAGAGGTTGTGA         | 60                           |
| <i>abcg1</i> | CAGGAAGATTAGACACTGTGG           | GAAAGGGGAATGGAGAGAAGA           | 59                           |
| <i>abcg5</i> | GTGGTTTATAGTCCCTTGCTCTTAC       | CACACGAGTCTCCCATAGGT            | 61                           |
| <i>abcg8</i> | GTGGGCAACATGTACGTG              | CAGAGGTGGGTTCGTCG               | 61                           |
| <i>srb1</i>  | TTGAACTTCTGGGCAAATG             | TGGGGATGCCTTCAAACAC             | 60                           |
| <i>lxrA</i>  | TCAGCATCTTCTCTGCAGACCGG         | TCATTAGCATCCGTGGGAACA           | 60                           |
| <i>lxrB</i>  | GCTAACAGCGGCTCAAGAACTAA         | GCTCCGTGAAGTGGGCAA              | 60                           |
| <i>pxr</i>   | TGCGCATCCAGGACATAC              | TCTCGGAGGTGTCACCC               | 59                           |
| <i>gapdh</i> | GAGTCAACGGATTTGGTCGT            | GACAAGCTTCCCGTTCTCAG            | 60                           |
| <i>cd36</i>  | GCAAGTCCTGATGTTTCAG             | GGTCCCAGTCTCATTAAAGC            | 62                           |
| <i>ldlr</i>  | ACCTGTCCCAGAGAATGATCT           | TCGGTCCAGTAGATGTTGC             | 60                           |
| <i>sra1</i>  | GGATACCCAGGTGTTCAAG             | CAGCCATATTGGACCAGTA             | 60                           |
| <i>idol</i>  | CACCCAGTCAGGAAAGAAT             | CTGTGTACACCTGTAGAA              | 64                           |
| <i>lox1</i>  | GCCTGATGAGAAGTCAAATG            | GTTAGGTTTGCTTGCTCTTG            | 62                           |

**SUPPLEMENTARY TABLE 2** Rat oligonucleotide sequences used for qRT-PCR analyses with annealing temperatures ( $T_a$ ).

| <b>Gene</b>  | <b>Forward primer (5' - 3')</b>       | <b>Reverse primer (5' - 3')</b> | <b><math>T_a</math> (°C)</b> |
|--------------|---------------------------------------|---------------------------------|------------------------------|
| <i>abca1</i> | CAAGAGATGGACCTTGTGCG                  | TGGGGACTGAACATCCTCTG            | 60                           |
| <i>abcg1</i> | GATGAAGGCAGACGGGAGA                   | AACAGGAGGGTTGTTGACCA            | 60                           |
| <i>lox-1</i> | CTATCCTTTCTTGGGTGTAAAAC               | TGCTTCTGGTCTTTGTCTCTG           | 60                           |
| <i>idol</i>  | GGCCATACTGTGTGCTGTGA                  | ATGTTCCACACGTGATCTGC            | 60                           |
| <i>ldlr</i>  | TGCTACTGGCCAAGGACAT                   | CTGGGTGGTCGGTACAGTG             | 60                           |
| <i>srb1</i>  | GGTGCCCATCATTTACCAAC                  | GCGAGCCCTTTTTACTACCA            | 60                           |
| <i>cd36</i>  | GCCTCCTTTCCACCTTTTGT                  | GATTCAAACACAGCATAGATGGA         | 60                           |
| <i>sra1</i>  | Rn01488115_m1 (TaqMan, Thermo Fisher) |                                 | 60                           |

**SUPPLEMENTARY TABLE 3** Differentially expressed genes in human mononuclear cells in vivo (n = 12) representing the effect of rifampicin (600 mg per day for one week) vs. placebo.

| Gene symbol | Description                                                                                           | Fold change |
|-------------|-------------------------------------------------------------------------------------------------------|-------------|
| HBG2        | Hemoglobin, gamma G                                                                                   | 1.1         |
| ABLIM1      | Actin binding LIM protein 1 transcript variant 2                                                      | 1.1         |
| GATA2       | Homo sapiens GATA binding protein 2                                                                   | 1.1         |
| HBG1        | Homo sapiens hemoglobin, gamma A                                                                      | 1.1         |
| MOAP1       | Homo sapiens modulator of apoptosis 1                                                                 | 1.1         |
| LILRB2      | Homo sapiens leukocyte immunoglobulin-like receptor, subfamily B (with TM and ITIM domains), member 2 | -1.1        |
| GPER        | Homo sapiens G protein-coupled estrogen receptor                                                      | -1.1        |
| IFNGR1      | Homo sapiens interferon gamma receptor 1                                                              | -1.1        |
| CISH        | Cytokine inducible SH2-containing protein                                                             | -1.1        |
| PRDM1       | PR domain containing 1, with ZNF domain                                                               | -1.1        |
| DYNLT1      | Dynein, light chain, Tctex-type 1                                                                     | -1.1        |
| HSPA6       | Heat shock 70kDa protein 6                                                                            | -1.2        |
| SLA         | Src-like-adaptor                                                                                      | -1.2        |
| KCNJ2       | Potassium inwardly-rectifying channel, subfamily J, member 2                                          | -1.2        |
| OAZ2        | Ornithine decarboxylase antizyme 2                                                                    | -1.3*       |

\*Statistically significant when false correction rate (FDR) was applied. The other transcripts are statistically significantly affected by rifampicin dosing without FDR ( $P < 0.05$ ).

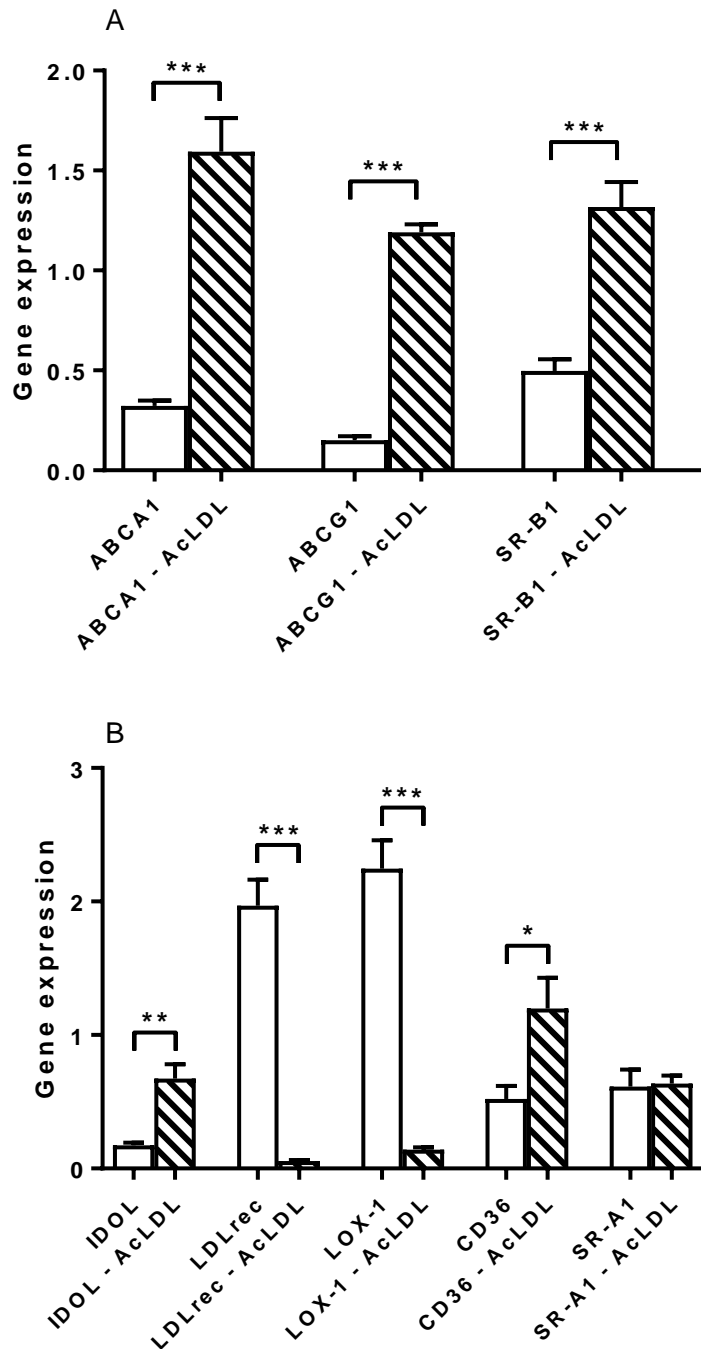

**SUPPLEMENTARY FIGURE 1** The effect of acetylated LDL on the expression of cholesterol efflux transporters (A) and influx transporters and IDOL (B) in human primary monocyte-macrophages in vitro measured with quantitative RT-PCR. The blank bars show the expression without acetylated LDL treatment and the striped bars present the expression after incubation with 50  $\mu\text{g/ml}$  acetylated LDL for 48 hours. The experiments were performed in four separate wells per experimental condition ( $n = 4$ ). Data are presented as the mean + SD. \* $P < 0.05$ , \*\* $P < 0.01$ , and \*\*\* $P < 0.001$ ; unpaired two-tailed Student's t-test.

## Muscle

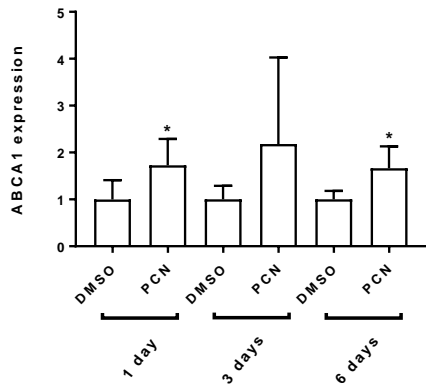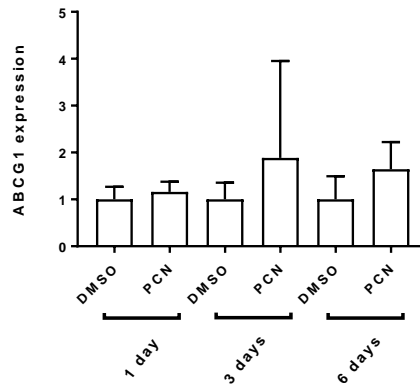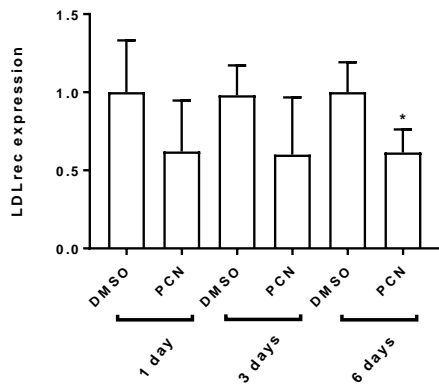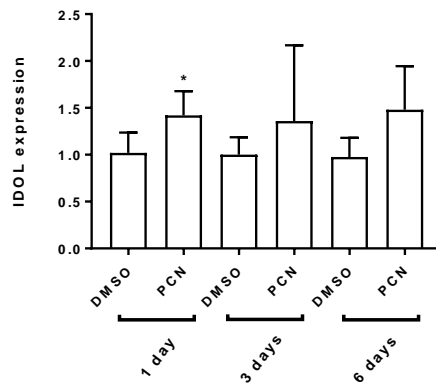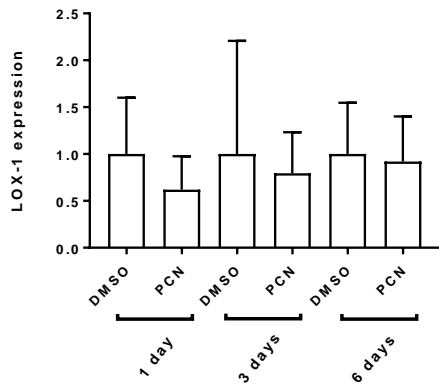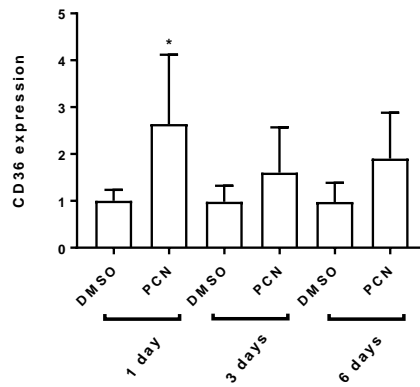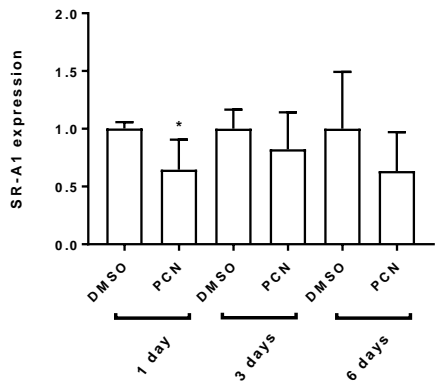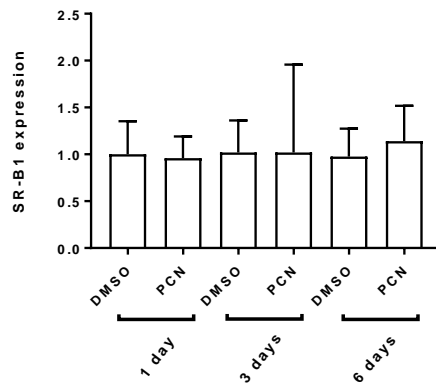

**SUPPLEMENTARY FIGURE 2** Effect of intraperitoneal pregnenolone 16 $\alpha$ -carbonitrile (a rat PXR agonist) 40 mg/kg versus vehicle control (DMSO) for 1, 3, or 6 days on the relative mRNA expression of cholesterol transporters in rat muscle in vivo as measured with quantitative RT-PCR. The experiments were performed with five rats per experimental condition ( $n = 5$ ). Data are presented as the mean + SD. \* $P < 0.05$  versus vehicle control; unpaired two-tailed Student's t-test.

## White adipose tissue

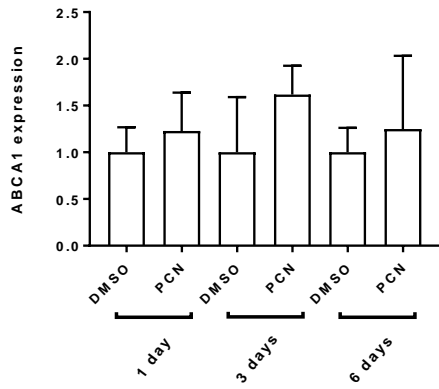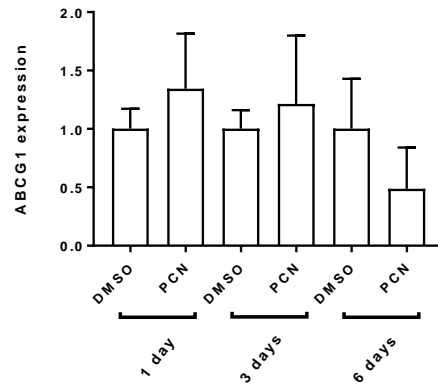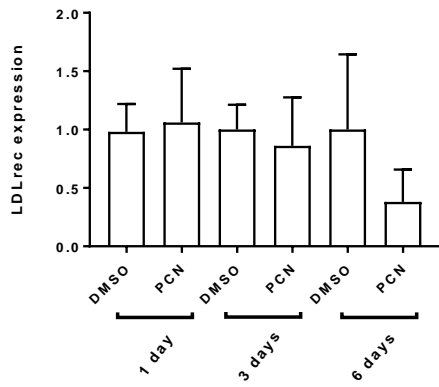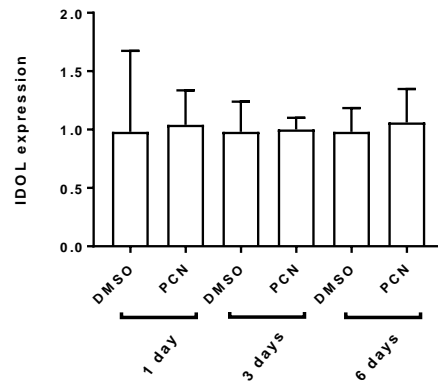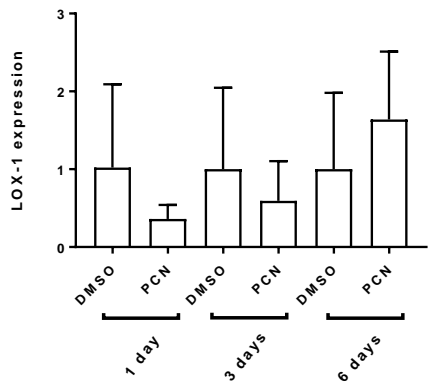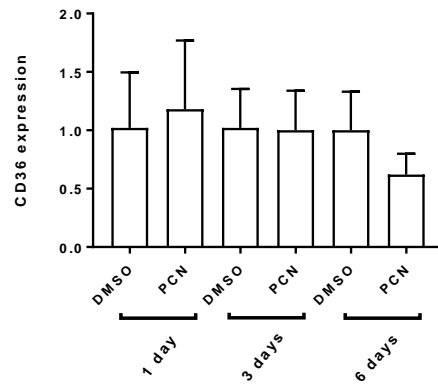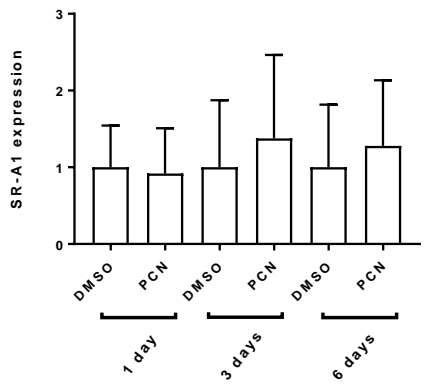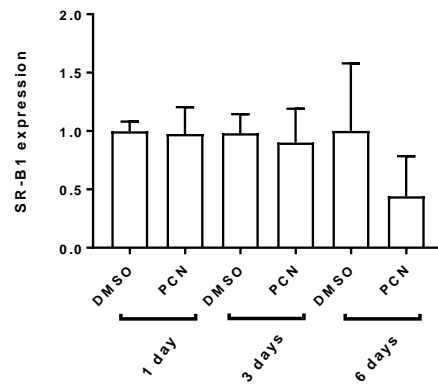

**SUPPLEMENTARY FIGURE 3** Effect of intraperitoneal pregnenolone 16 $\alpha$ -carbonitrile (a rat PXR agonist) 40 mg/kg versus vehicle control (DMSO) for 1, 3, or 6 days on the relative mRNA expression of cholesterol transporters in rat white adipose tissue in vivo as measured with quantitative RT-PCR. The experiments were performed with five rats per experimental condition ( $n = 5$ ). Data are presented as the mean + SD.



## Adrenal gland

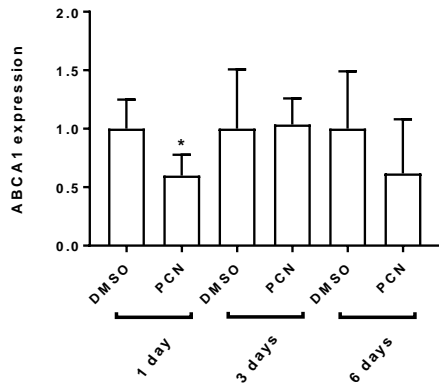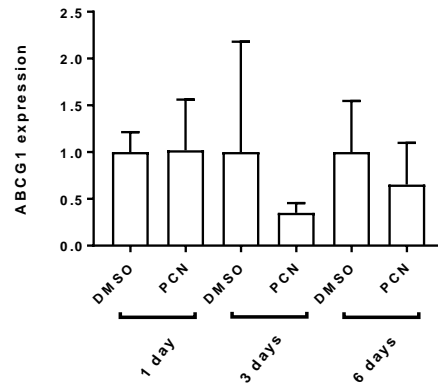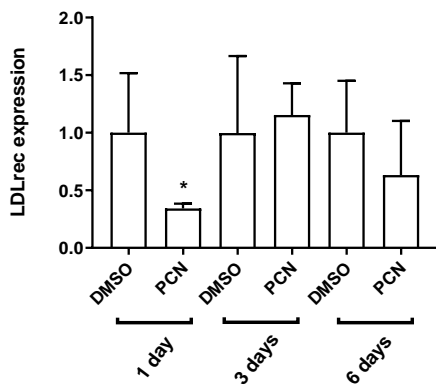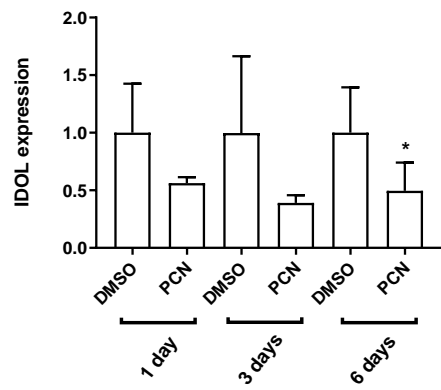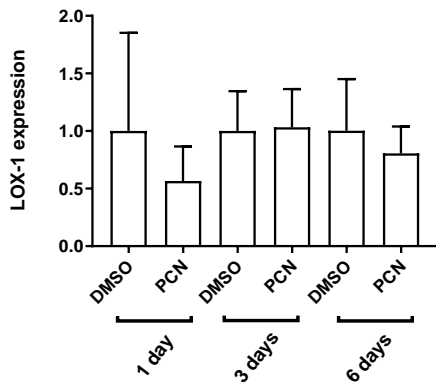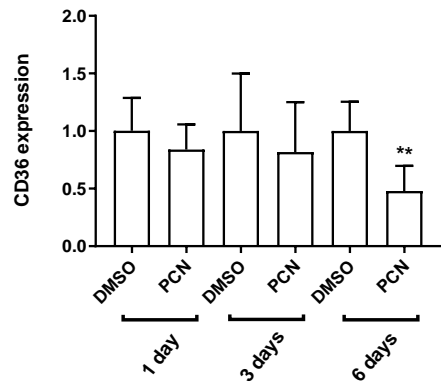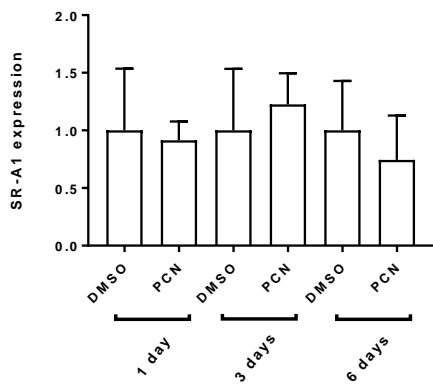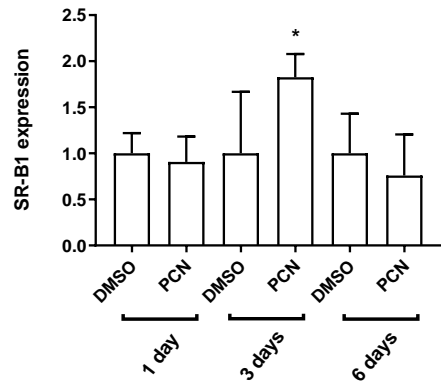

**SUPPLEMENTARY FIGURE 4** Effect of intraperitoneal pregnenolone 16 $\alpha$ -carbonitrile (a rat PXR agonist) 40 mg/kg versus vehicle control (DMSO) for 1, 3, or 6 days on the relative mRNA expression of cholesterol transporters in rat adrenal gland in vivo as measured with quantitative RT-PCR. The experiments were performed with five rats per experimental condition ( $n = 5$ ). Data are presented as the mean + SD. \* $P < 0.05$  and \*\* $P < 0.01$  versus vehicle control; unpaired two-tailed Student's t-test.

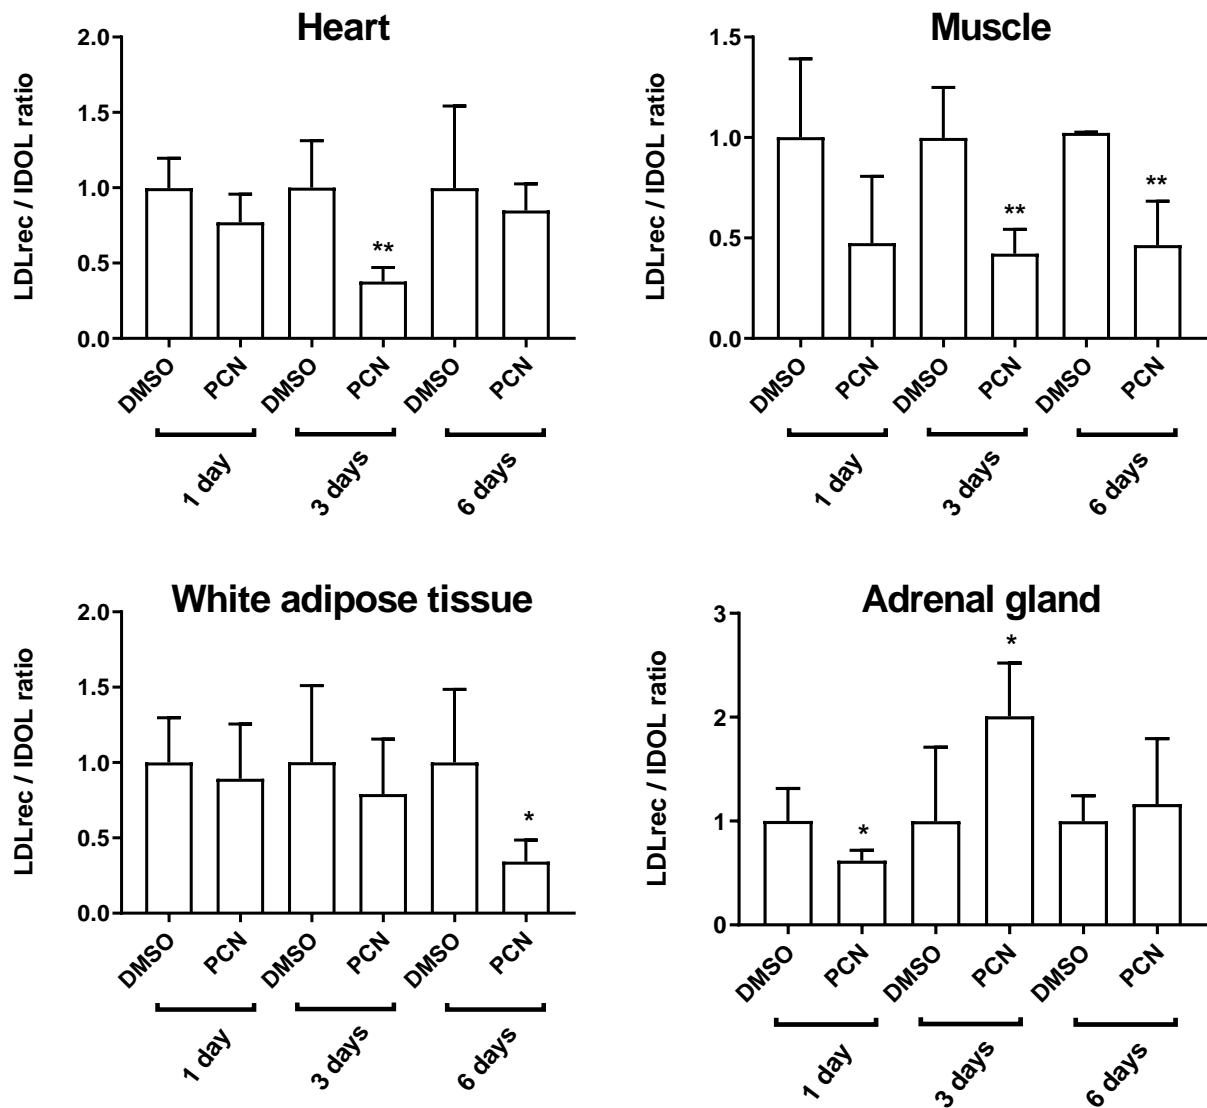

**SUPPLEMENTARY FIGURE 5** Effect of intraperitoneal pregnenolone 16 $\alpha$ -carbonitrile (a rat PXR agonist) 40 mg/kg versus vehicle control (DMSO) for 1, 3, or 6 days on the ratio of LDL receptor to IDOL expression in rat tissues *in vivo* as measured with quantitative RT-PCR. The experiments were performed with five rats per experimental condition ( $n = 5$ ). Data are presented as the mean + SD. \* $P < 0.05$  and \*\* $P < 0.01$  versus vehicle control; unpaired two-tailed Student's t-test.

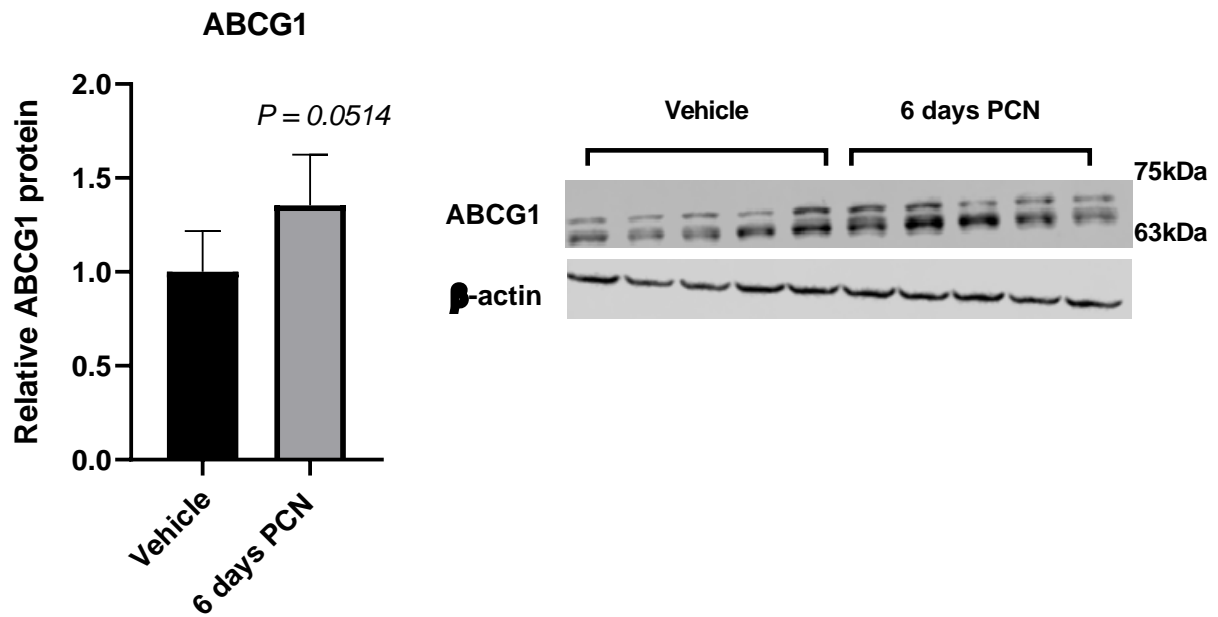

**SUPPLEMENTARY FIGURE 6** Effect of intraperitoneal pregnenolone 16 $\alpha$ -carbonitrile (a rat PXR agonist) 40 mg/kg versus vehicle control (DMSO) for 6 days on the ABCG1 protein expression in the rat heart (left ventricle). The experiments were performed with five rats per experimental condition (n = 5). Data are presented as the mean + SD. Unpaired two-tailed Student's t-test.
